# Supplementary material
Source: publisher site journal article supplement (https://www.dovepress.com/article/358839)
Supplement: Supplementary file 1 [file get_supplementary_file.php]

**Figure S1|Schematic maps of IncHI5 plasmids carried by *Klebsiella michiganensis*.**



**Figure S2|Linear comparison of IncHI5 plasmids.**

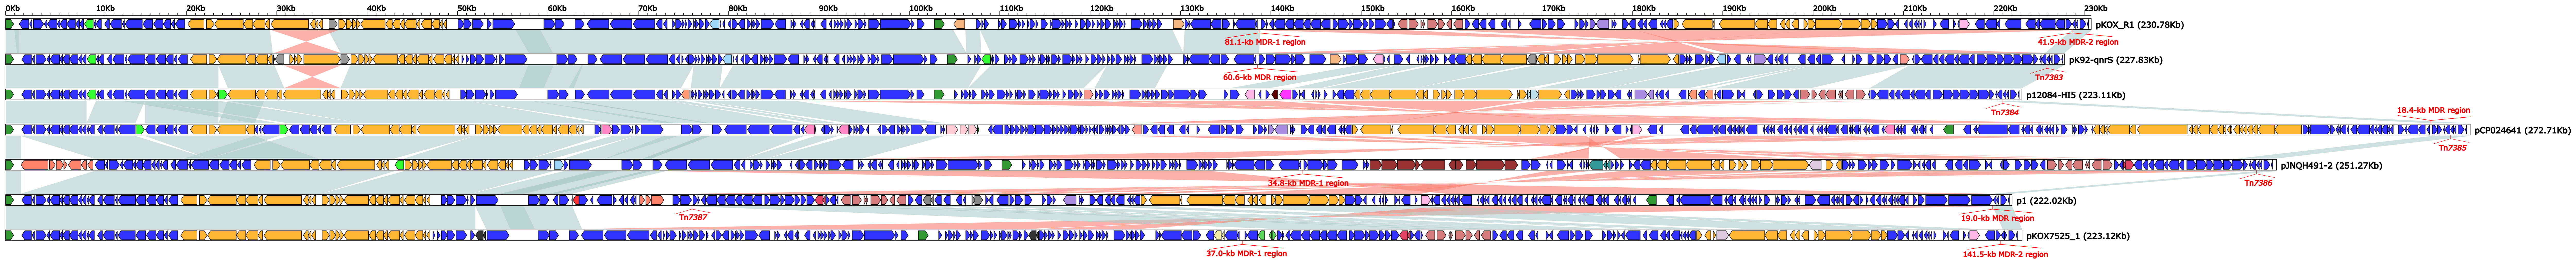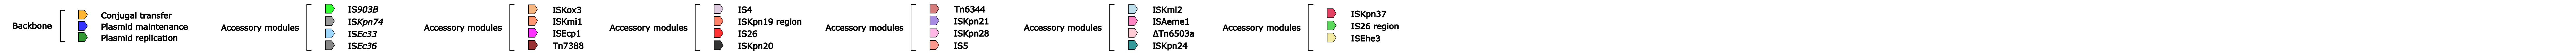

**Table S1|Background of *Klebsiella michiganensis* isolates**

| Accession number | Organism                        | Assembly name | Assembly accession | Source         | Origin                     | IncHI5 plasmid carried | Assembly level  | Length of chromosome (bp) | Submission date |
|------------------|---------------------------------|---------------|--------------------|----------------|----------------------------|------------------------|-----------------|---------------------------|-----------------|
| CP089315         | <i>Klebsiella michiganensis</i> | -             | -                  | New sequencing | Taizhou, Zhejiang China    | pK92-qnrS              | Complete Genome | 6108919                   | 2021/12/19      |
| CP003683         | <i>Klebsiella michiganensis</i> | ASM27670v2    | GCA_000276705.2    | NCBI-Gen Bank  | Miaoli, Taiwan China       | pKOX_R1                | Complete Genome | 6561678                   | 2012/7/10       |
| CP072119         | <i>Klebsiella michiganensis</i> | ASM1763989v1  | GCA_017639895.1    | NCBI-Gen Bank  | Zhejiang, China            | p12084-HI5             | Complete Genome | 6248475                   | 2021/3/30       |
| CP024643         | <i>Klebsiella michiganensis</i> | ASM993085v1   | GCA_009930855.1    | NCBI-Gen Bank  | Fuzhou, Fujian China       | pCP024641              | Complete Genome | 6152545                   | 2020/1/27       |
| CP075881         | <i>Klebsiella michiganensis</i> | ASM1860410v1  | GCA_018604105.1    | NCBI-Gen Bank  | Xiamen, Fujian China       | pJNQH491-2             | Complete Genome | 6552775                   | 2021/6/1        |
| CP067093         | <i>Klebsiella michiganensis</i> | ASM1661664v1  | GCA_016616645.1    | NCBI-Gen Bank  | Guangzhou, Guangdong China | p1                     | Complete Genome | 6466118                   | 2021/1/12       |
| CP065474         | <i>Klebsiella michiganensis</i> | ASM1599938v1  | GCA_015999385.1    | NCBI-Gen Bank  | Hangzhou, Zhejiang China   | pKOX7525_1             | Complete Genome | 6244801                   | 2020/12/13      |
| AP022547         | <i>Klebsiella michiganensis</i> | ASM1513957v1  | GCA_015139575.1    | NCBI-Gen Bank  | Tokyo, Japan               | -                      | Complete Genome | 6041841                   | 2020/10/8       |
| CP003218         | <i>Klebsiella michiganensis</i> | ASM24032v1    | GCA_000240325.1    | NCBI-Gen Bank  | Daejun, South Korea        | -                      | Complete Genome | 5974109                   | 2011/12/29      |
| CP004887         | <i>Klebsiella michiganensis</i> | ASM63241v1    | GCA_000632415.1    | NCBI-Gen Bank  | HongKong, China            | -                      | Complete Genome | 5914407                   | 2014/4/15       |
| CP008841         | <i>Klebsiella michiganensis</i> | ASM72452v1    | GCA_000724525.1    | NCBI-Gen Bank  | Manripo area, South Korea  | -                      | Complete Genome | 6311385                   | 2014/7/9        |
| CP022348         | <i>Klebsiella michiganensis</i> | ASM221683v1   | GCA_002216835.1    | NCBI-Gen Bank  | Zhejiang, China            | -                      | Complete Genome | 6418740                   | 2017/7/12       |
| CP023185         | <i>Klebsiella michiganensis</i> | ASM229028v1   | GCA_002290285.1    | NCBI-Gen Bank  | Zhejiang, China            | -                      | Complete Genome | 6418567                   | 2017/9/12       |

|          |                                 |                  |                     |                  |                                |   |                    |         |           |
|----------|---------------------------------|------------------|---------------------|------------------|--------------------------------|---|--------------------|---------|-----------|
| CP029141 | <i>Klebsiella michiganensis</i> | ASM3074<br>07v1  | GCA_003074<br>075.1 | NCBI-Gen<br>Bank | USA                            | - | Complete<br>Genome | 6525490 | 2018/4/30 |
| CP035214 | <i>Klebsiella michiganensis</i> | ASM4102<br>62v1  | GCA_004102<br>625.1 | NCBI-Gen<br>Bank | Queensland,<br>Australia       | - | Complete<br>Genome | 6604517 | 2019/1/22 |
| CP041515 | <i>Klebsiella michiganensis</i> | ASM7106<br>88v1  | GCA_007106<br>885.1 | NCBI-Gen<br>Bank | South Korea                    | - | Complete<br>Genome | 6270897 | 2019/7/18 |
| CP044109 | <i>Klebsiella michiganensis</i> | ASM8693<br>56v1  | GCA_008693<br>565.1 | NCBI-Gen<br>Bank | Washington D.C.,<br>USA        | - | Complete<br>Genome | 6656590 | 2019/9/25 |
| CP042545 | <i>Klebsiella michiganensis</i> | ASM8931<br>60v1  | GCA_008931<br>605.1 | NCBI-Gen<br>Bank | Sydney, Australia              | - | Complete<br>Genome | 6312326 | 2019/10/9 |
| CP048108 | <i>Klebsiella michiganensis</i> | ASM1009<br>300v1 | GCA_010093<br>005.1 | NCBI-Gen<br>Bank | Wuhan, Hubei<br>China          | - | Complete<br>Genome | 6812698 | 2020/2/3  |
| CP055325 | <i>Klebsiella michiganensis</i> | ASM1361<br>065v1 | GCA_013610<br>655.1 | NCBI-Gen<br>Bank | UK                             | - | Complete<br>Genome | 6603523 | 2020/7/24 |
| CP058118 | <i>Klebsiella michiganensis</i> | ASM1362<br>437v1 | GCA_013624<br>375.1 | NCBI-Gen<br>Bank | UK                             | - | Complete<br>Genome | 6544295 | 2020/7/24 |
| CP058212 | <i>Klebsiella michiganensis</i> | ASM1363<br>641v1 | GCA_013636<br>415.1 | NCBI-Gen<br>Bank | UK                             | - | Complete<br>Genome | 6236062 | 2020/7/24 |
| CP056136 | <i>Klebsiella michiganensis</i> | ASM1373<br>265v1 | GCA_013732<br>655.1 | NCBI-Gen<br>Bank | UK                             | - | Complete<br>Genome | 6609426 | 2020/7/27 |
| CP060111 | <i>Klebsiella michiganensis</i> | ASM1421<br>727v1 | GCA_014217<br>275.1 | NCBI-Gen<br>Bank | Liuzhou, Guangxi<br>China      | - | Complete<br>Genome | 6149586 | 2020/8/17 |
| CP061930 | <i>Klebsiella michiganensis</i> | ASM1661<br>821v1 | GCA_016618<br>215.1 | NCBI-Gen<br>Bank | 3097 Liebefeld,<br>Switzerland | - | Complete<br>Genome | 6865058 | 2021/1/12 |
| CP071393 | <i>Klebsiella michiganensis</i> | ASM1734<br>885v1 | GCA_017348<br>855.1 | NCBI-Gen<br>Bank | Hengyang, Hunan<br>China       | - | Complete<br>Genome | 6398286 | 2021/3/13 |
| CP065338 | <i>Klebsiella michiganensis</i> | ASM1779<br>828v1 | GCA_017798<br>285.1 | NCBI-Gen<br>Bank | Shanxi, China                  | - | Complete<br>Genome | 5791694 | 2021/4/6  |
| CP051427 | <i>Klebsiella michiganensis</i> | ASM1781<br>577v1 | GCA_017815<br>775.1 | NCBI-Gen<br>Bank | Jilin, China                   | - | Complete<br>Genome | 5845628 | 2021/4/7  |

|          |                                 |                  |                     |                  |                           |   |                    |         |           |
|----------|---------------------------------|------------------|---------------------|------------------|---------------------------|---|--------------------|---------|-----------|
| CP073236 | <i>Klebsiella michiganensis</i> | ASM1813<br>904v1 | GCA_018139<br>045.1 | NCBI-Gen<br>Bank | Hunan, China              | - | Complete<br>Genome | 5910952 | 2021/4/25 |
| CP073305 | <i>Klebsiella michiganensis</i> | ASM1814<br>094v1 | GCA_018140<br>945.1 | NCBI-Gen<br>Bank | Pilsen, Czech<br>Republic | - | Complete<br>Genome | 6494581 | 2021/4/27 |
| CP081351 | <i>Klebsiella michiganensis</i> | ASM1980<br>306v1 | GCA_019803<br>065.1 | NCBI-Gen<br>Bank | Quebec City,<br>Canada    | - | Complete<br>Genome | 6128315 | 2021/8/30 |
| CP085764 | <i>Klebsiella michiganensis</i> | ASM2069<br>562v1 | GCA_020695<br>625.1 | NCBI-Gen<br>Bank | Prague, Czech<br>Republic | - | Complete<br>Genome | 6455282 | 2021/11/1 |
| CP011077 | <i>Klebsiella michiganensis</i> | ASM9635<br>7v1   | GCA_000963<br>575.1 | NCBI-Gen<br>Bank | Zhejiang, China           | - | Complete<br>Genome | 5107633 | 2015/3/26 |

**Table S2|Pairwise comparison of the seven IncHI5 plasmids backbone sequences using BLASTN**

| <b>(coverage+identity)</b> | <b>pK92-qnrS</b> | <b>pKOX_R1</b> | <b>p12084-HI5</b> | <b>pCP024641</b> | <b>pJNQH491-2</b> | <b>p1</b>    | <b>pKOX7525_1</b> |
|----------------------------|------------------|----------------|-------------------|------------------|-------------------|--------------|-------------------|
| <b>pK92-qnrS</b>           |                  | (100%+99.40%)  | (91%+99.92%)      | (85%+99.10%)     | (95%+99.57%)      | (89%+99.43%) | (91%+99.30%)      |
| <b>pKOX_R1</b>             | (100%+99.40%)    |                | (90%+99.91%)      | (94%+99.40%)     | (95%+99.32%)      | (89%+99.42%) | (91%+99.62%)      |
| <b>p12084-HI5</b>          | (96%+99.92%)     | (96%+99.91%)   |                   | (93%+99.96%)     | (93%+99.75%)      | (93%+99.54%) | (95%+99.82%)      |
| <b>pCP024641</b>           | (76%+99.10%)     | (76%+99.40%)   | (78%+99.96%)      |                  | (73%+99.40%)      | (75%+99.43%) | (73%+99.42%)      |
| <b>pJNQH491-2</b>          | (97%+99.57%)     | (97%+99.32%)   | (89%+99.75%)      | (84%+99.40%)     |                   | (87%+99.91%) | (96%+99.54%)      |
| <b>p1</b>                  | (94%+99.43%)     | (94%+99.42%)   | (95%+99.82%)      | (88%+99.43%)     | (90%+99.91%)      |              | (90%+99.91%)      |
| <b>pKOX7525_1</b>          | (97%+99.30%)     | (97%+99.62%)   | (92%+99.54%)      | (85%+99.42%)     | (99%+99.54%)      | (90%+99.63%) |                   |



**Table S3|Drug resistance genes in IncHI5 plasmids**

| Plasmid                      | Resistance marker           | Resistance phenotype                                  | Nucleotide position       | Region located       |                      |                    |
|------------------------------|-----------------------------|-------------------------------------------------------|---------------------------|----------------------|----------------------|--------------------|
| pKOX_R1                      | <i>fosA3</i>                | Fosfomycin resistance                                 | 147479..147895            | 81.1-kb MDR-1 region |                      |                    |
|                              | <i>bla<sub>SHV-12</sub></i> | Beta-lactam resistance                                | 152565..153425            |                      |                      |                    |
|                              | <i>sul2</i>                 | Sulphonamide resistance                               | 157855..158670            |                      |                      |                    |
|                              | <i>strA</i>                 | Aminoglycoside resistance                             | 158775..159533            |                      |                      |                    |
|                              | <i>strB</i>                 | Aminoglycoside resistance                             | 159533..160369            |                      |                      |                    |
|                              | <i>qnrS1</i>                | Quinolone resistance                                  | 164610..165266            |                      |                      |                    |
|                              | <i>dfrA1</i>                | Trimethoprim resistance                               | 171652..172125            |                      |                      |                    |
|                              | <i>aadA5</i>                | Aminoglycoside resistance                             | 172642..173430            |                      |                      |                    |
|                              | <i>qacED1</i>               | Quaternary ammonium compound resistance               | 173598..173945            |                      |                      |                    |
|                              | <i>sul1</i>                 | Sulphonamide resistance                               | 173939..174778            |                      |                      |                    |
|                              | <i>armA</i>                 | Aminoglycoside resistance                             | 178123..178896            |                      |                      |                    |
|                              | <i>msr(E)</i>               | Macrolide, Lincosamide and Streptogramin B resistance | 181195..182670            |                      |                      |                    |
|                              | <i>mph(E)</i>               | Macrolide resistance                                  | 182726..183610            |                      |                      |                    |
|                              | The <i>ars</i> locus        | Arsenic resistance                                    | 196047..199194            |                      |                      |                    |
|                              | <i>catA2</i>                | Phenicol resistance                                   | 200680..201297            |                      |                      |                    |
|                              | <i>tmrB</i>                 | Tunicamycin resistance                                | 211633..212175            |                      |                      |                    |
|                              | <i>aacC2</i>                | Aminoglycoside resistance                             | 212188..213048            |                      |                      |                    |
|                              | The <i>mer</i> locus        | Mercuric resistance                                   | 215952..219928            |                      |                      |                    |
|                              | The <i>ter</i> locus        | Tellurium resistance                                  | 220965..233902            | Plasmid backbone     |                      |                    |
|                              | pK92-qnrS                   | <i>mph(E)</i>                                         | Macrolide resistance      | 323372..324256       | 41.9-kb MDR-2 region |                    |
| <i>msr(E)</i>                |                             | Macrolide, Lincosamide and Streptogramin B resistance | 324312..325787            |                      |                      |                    |
| <i>armA</i>                  |                             | Aminoglycoside resistance                             | 328086..328859            |                      |                      |                    |
| <i>sul1</i>                  |                             | Sulphonamide resistance                               | 332204..333043            |                      |                      |                    |
| <i>qacED1</i>                |                             | Quaternary ammonium compound resistance               | 333037..333384            |                      |                      |                    |
| <i>aadA2</i>                 |                             | Aminoglycoside resistance                             | 333548..334339            |                      |                      |                    |
| <i>dfrA12</i>                |                             | Trimethoprim resistance                               | 334747..335244            |                      |                      |                    |
| <i>bla<sub>CTX-M-3</sub></i> |                             | Beta-lactam resistance                                | 337375..338250            |                      |                      |                    |
| <i>bla<sub>TEM-1B</sub></i>  |                             | Beta-lactam resistance                                | 339032..339891            |                      |                      |                    |
| <i>arr3</i>                  |                             | Rifampicin resistance                                 | 344106..344558            |                      |                      |                    |
| <i>aacA4cr</i>               |                             | Fluoroquinolone and aminoglycoside resistance         | 344655..345254            |                      |                      |                    |
| pK92-qnrS                    |                             | <i>sul2</i>                                           | Sulphonamide resistance   | 149109..149924       |                      | 60.6-kb MDR region |
|                              |                             | <i>strA</i>                                           | Aminoglycoside resistance | 149985..150788       |                      |                    |
|                              | <i>strB</i>                 | Aminoglycoside resistance                             | 150788..151624            |                      |                      |                    |
|                              | <i>qnrS1</i>                | Quinolone resistance                                  | 155865..156521            |                      |                      |                    |
|                              | <i>aacA4cr</i>              | Fluoroquinolone and aminoglycoside resistance         | 303406..304005            |                      |                      |                    |
|                              | <i>arr3</i>                 | Rifampicin resistance                                 | 163354..163806            |                      |                      |                    |

|            |                               |                                                       |                 |                    |
|------------|-------------------------------|-------------------------------------------------------|-----------------|--------------------|
|            | <i>dfrA12</i>                 | Trimethoprim resistance                               | 172469..172966  | Plasmid backbone   |
|            | <i>aadA2</i>                  | Aminoglycoside resistance                             | 173386..174165  |                    |
|            | <i>qacED1</i>                 | Quaternary ammonium compound resistance               | 174329..174676  |                    |
|            | <i>sul1</i>                   | Sulphonamide resistance                               | 174670..175509  |                    |
|            | <i>armA</i>                   | Aminoglycoside resistance                             | 178854..179627  |                    |
|            | <i>msr(E)</i>                 | Macrolide, Lincosamide and Streptogramin B resistance | 181926..183401  |                    |
|            | <i>mph(E)</i>                 | Macrolide resistance                                  | 183457..184341  |                    |
|            | The <i>ter</i> locus          | Tellurium resistance                                  | 272549..285487  |                    |
|            | The <i>mer</i> locus          | Mercuric resistance                                   | 286524..290500  | Tn7383             |
|            | <i>aacC2</i>                  | Aminoglycoside resistance                             | 294742 295602   |                    |
|            | <i>tmrB</i>                   | Tunicamycin resistance                                | 295615 296157   |                    |
|            | <i>arr3</i>                   | Rifampicin resistance                                 | 302857 303309   |                    |
|            | <i>aacA4cr</i>                | Fluoroquinolone and aminoglycoside resistance         | 303406 304005   |                    |
| p12084-HI5 | The <i>ter</i> locus          | Tellurium resistance                                  | 207068..220006  | Plasmid backbone   |
|            | The <i>mer</i> locus          | Mercuric resistance                                   | 221043.. 225019 | Tn7384             |
|            | <i>fosA3</i>                  | Fosfomycin resistance                                 | 227235..227651  |                    |
|            | <i>mph(E)</i>                 | Macrolide resistance                                  | 251162..252046  |                    |
|            | <i>msr(E)</i>                 | Macrolide, Lincosamide and Streptogramin B resistance | 252102..253577  |                    |
|            | <i>armA</i>                   | Aminoglycoside resistance                             | 255876..256623  |                    |
|            | <i>sul1</i>                   | Sulphonamide resistance                               | 261084..261923  |                    |
|            | <i>qacED1</i>                 | Quaternary ammonium compound resistance               | 261917..262264  |                    |
|            | <i>aadA17</i>                 | Aminoglycoside resistance                             | 262428..263219  |                    |
|            | <i>catB3</i>                  | Phenicol resistance                                   | 263277..263909  |                    |
|            | <i>arr3</i>                   | Rifampicin resistance                                 | 264058..264510  |                    |
|            | <i>bla<sub>SIM-1</sub></i>    | Beta-lactam resistance                                | 264662..265402  |                    |
| pCP024641  | <i>bla<sub>CTX-M-14</sub></i> | Beta-lactam resistance                                | 105614..106489  | $\Delta$ Tn6503a   |
|            | <i>sul2</i>                   | Sulphonamide resistance                               | 268523..269338  | 18.4-kb MDR region |
|            | <i>strA</i>                   | Aminoglycoside resistance                             | 269399..270202  |                    |
|            | <i>strB</i>                   | Aminoglycoside resistance                             | 270208..271038  |                    |
|            | <i>bla<sub>TEM-1</sub></i>    | Beta-lactam resistance                                | 271453..272313  |                    |
|            | <i>tmrB</i>                   | Tunicamycin resistance                                | 276730..277272  |                    |
|            | <i>aacC2</i>                  | Aminoglycoside resistance                             | 277285..278145  |                    |
|            | <i>terW</i>                   | Tellurium resistance                                  | 287488..287961  | Plasmid backbone   |
|            | The <i>mer</i> locus          | Mercuric resistance                                   | 288998..292974  | Tn7385             |
|            | <i>sul1</i>                   | Sulphonamide resistance                               | 295710..296549  |                    |
|            | <i>qacED1</i>                 | Quaternary ammonium compound resistance               | 296543..296890  |                    |
|            | <i>arr3</i>                   | Rifampicin resistance                                 | 297113..297565  |                    |
|            | <i>catB3</i>                  | Phenicol resistance                                   | 297650..298282  |                    |
|            | <i>bla<sub>OXA-1</sub></i>    | Beta-lactam resistance                                | 298420..299295  |                    |

|              |                            |                                                       |                |                                             |
|--------------|----------------------------|-------------------------------------------------------|----------------|---------------------------------------------|
|              | <i>aacA4cr</i>             | Fluoroquinolone and aminoglycoside resistance         | 299381..299980 |                                             |
| pJNQH491-2   | <i>qacED1</i>              | Quaternary ammonium compound resistance               | 153648..153995 | 34.8-kb MDR-1 region                        |
|              | <i>sulI</i>                | Sulphonamide resistance                               | 153989..154828 |                                             |
|              | <i>chrA</i>                | Chromate resistance                                   | 156642..157847 |                                             |
|              | <i>mph(A)</i>              | Macrolide resistance                                  | 161466..162371 |                                             |
|              | <i>aacC2</i>               | Aminoglycoside resistance                             | 163430..164290 |                                             |
|              | <i>tmrB</i>                | Tunicamycin resistance                                | 164303..164845 |                                             |
|              | <i>bla<sub>TEM-1</sub></i> | Beta-lactam resistance                                | 169262..170122 |                                             |
|              | The <i>mer</i> locus       | Mercuric resistance                                   | 171731..175693 | Plasmid backbone                            |
|              | The <i>ter</i> locus       | Tellurium resistance                                  | 268768..282962 |                                             |
|              | <i>qnrS1</i>               | Quinolone resistance                                  | 287106..287762 | 21.3-kb MDR-2 region                        |
|              | <i>ble<sub>MBL</sub></i>   | Bleomycin resistance                                  | 293627..293992 |                                             |
|              | <i>bla<sub>NDM-1</sub></i> | Beta-lactam resistance                                | 293996..294808 |                                             |
|              | <i>sulI</i>                | Sulphonamide resistance                               | 297263..298102 |                                             |
|              | <i>qacED1</i>              | Quaternary ammonium compound resistance               | 298096..298443 |                                             |
| <i>dfrB4</i> | Trimethoprim resistance    | 298656..298892                                        |                |                                             |
| p1           | <i>qacED1</i>              | Quaternary ammonium compound resistance               | 85621..85968   | 43.1-kb <i>mph(E)-msr(E)-tetA(D)</i> region |
|              | <i>sulI</i>                | Sulphonamide resistance                               | 85962..86801   |                                             |
|              | <i>msr(E)</i>              | Macrolide, Lincosamide and Streptogramin B resistance | 89099..90574   |                                             |
|              | <i>mph(E)</i>              | Macrolide resistance                                  | 90630..91514   |                                             |
|              | <i>tetA(D)</i>             | Tetracycline resistance                               | 114171..115355 |                                             |
|              | The <i>ter</i> locus       | Tellurium resistance                                  | 120113..134307 | Plasmid backbone                            |
|              | <i>fosA3</i>               | Fosfomycin resistance                                 | 265596..266012 | 19.0-kb MDR region                          |
|              | <i>mph(A)</i>              | Macrolide resistance                                  | 267224..268129 |                                             |
|              | <i>sulI</i>                | Sulphonamide resistance                               | 272340..273179 |                                             |
|              | <i>qacED1</i>              | Quaternary ammonium compound resistance               | 273173..273520 |                                             |
|              | <i>aadA16</i>              | Fluoroquinolone and aminoglycoside resistance         | 273637..274482 |                                             |
|              | <i>dfrA27</i>              | Trimethoprim resistance                               | 274663..275136 |                                             |
|              | <i>arr3</i>                | Rifampicin resistance                                 | 275269..275895 |                                             |
| pKOX7525_1   | <i>strA</i>                | Aminoglycoside resistance                             | 141009..141799 | 37.0-kb MDR-1 region                        |
|              | <i>strB</i>                | Aminoglycoside resistance                             | 141799..142635 |                                             |
|              | <i>chrA</i>                | Chromate resistance                                   | 165322..166527 |                                             |
|              | <i>mph(A)</i>              | Macrolide resistance                                  | 170146..171051 |                                             |
|              | <i>msrA</i>                | Erythromycin and streptogramin B resistance           | 150603..151142 |                                             |
|              | <i>msrB</i>                | Erythromycin and streptogramin B resistance           | 151144..151587 |                                             |
|              | The <i>ter</i> locus       | Tellurium resistance                                  | 178713..192907 | Plasmid backbone                            |

|  |                             |                                                  |                                  |                          |
|--|-----------------------------|--------------------------------------------------|----------------------------------|--------------------------|
|  | The <i>ars</i> locus        | Arsenic resistance                               | 258036..269626                   | 141.5-kb MDR-2<br>region |
|  | <i>sulI</i>                 | Sulphonamide resistance                          | 285807..286646<br>293204..294043 |                          |
|  | <i>qacED1</i>               | Quaternary ammonium                              | 286640..286987<br>294037..294384 |                          |
|  | <i>aadA1</i>                | Aminoglycoside resistance                        | 287111..287926                   |                          |
|  | <i>bla<sub>OXA-16</sub></i> | Beta-lactam resistance                           | 287919..288686                   |                          |
|  | <i>bla<sub>NDM-1</sub></i>  | Beta-lactam resistance                           | 288836..289648                   |                          |
|  | <i>ble<sub>MBL</sub></i>    | Bleomycin resistance                             | 289652..290017                   |                          |
|  | <i>aadA16</i>               | Aminoglycoside resistance                        | 294501..295346                   |                          |
|  | <i>dfrA27</i>               | Trimethoprim resistance                          | 295527..296000                   |                          |
|  | <i>arr3</i>                 | Rifampicin resistance                            | 296133..296585                   |                          |
|  | <i>aacA4cr</i>              | Fluoroquinolone and<br>aminoglycoside resistance | 296682..297281                   |                          |
|  | <i>qnrS1</i>                | Quinolone resistance                             | 356331..356987                   |                          |
|  | <i>bla<sub>SFO-1</sub></i>  | Beta-lactam resistance                           | 364393..365280                   |                          |
|  | The <i>mer</i> locus        | Mercuric resistance                              | 374933..378586                   |                          |
|  | <i>aacA4</i>                | Aminoglycoside resistance                        | 384997..385515                   |                          |
|  | <i>qacG2</i>                | Quaternary ammonium<br>compound resistance       | 385678..386010                   |                          |
|  | <i>bla<sub>IMP-4</sub></i>  | Beta-lactam resistance                           | 388189..388929                   |                          |
